# Supplementary material
Source: Research Square preprint supplement (doi:10.21203/rs.3.rs-9424134/v1)
Supplement: Supplementary file 1 [file 101a7713503f38da6ea149bf.docx]

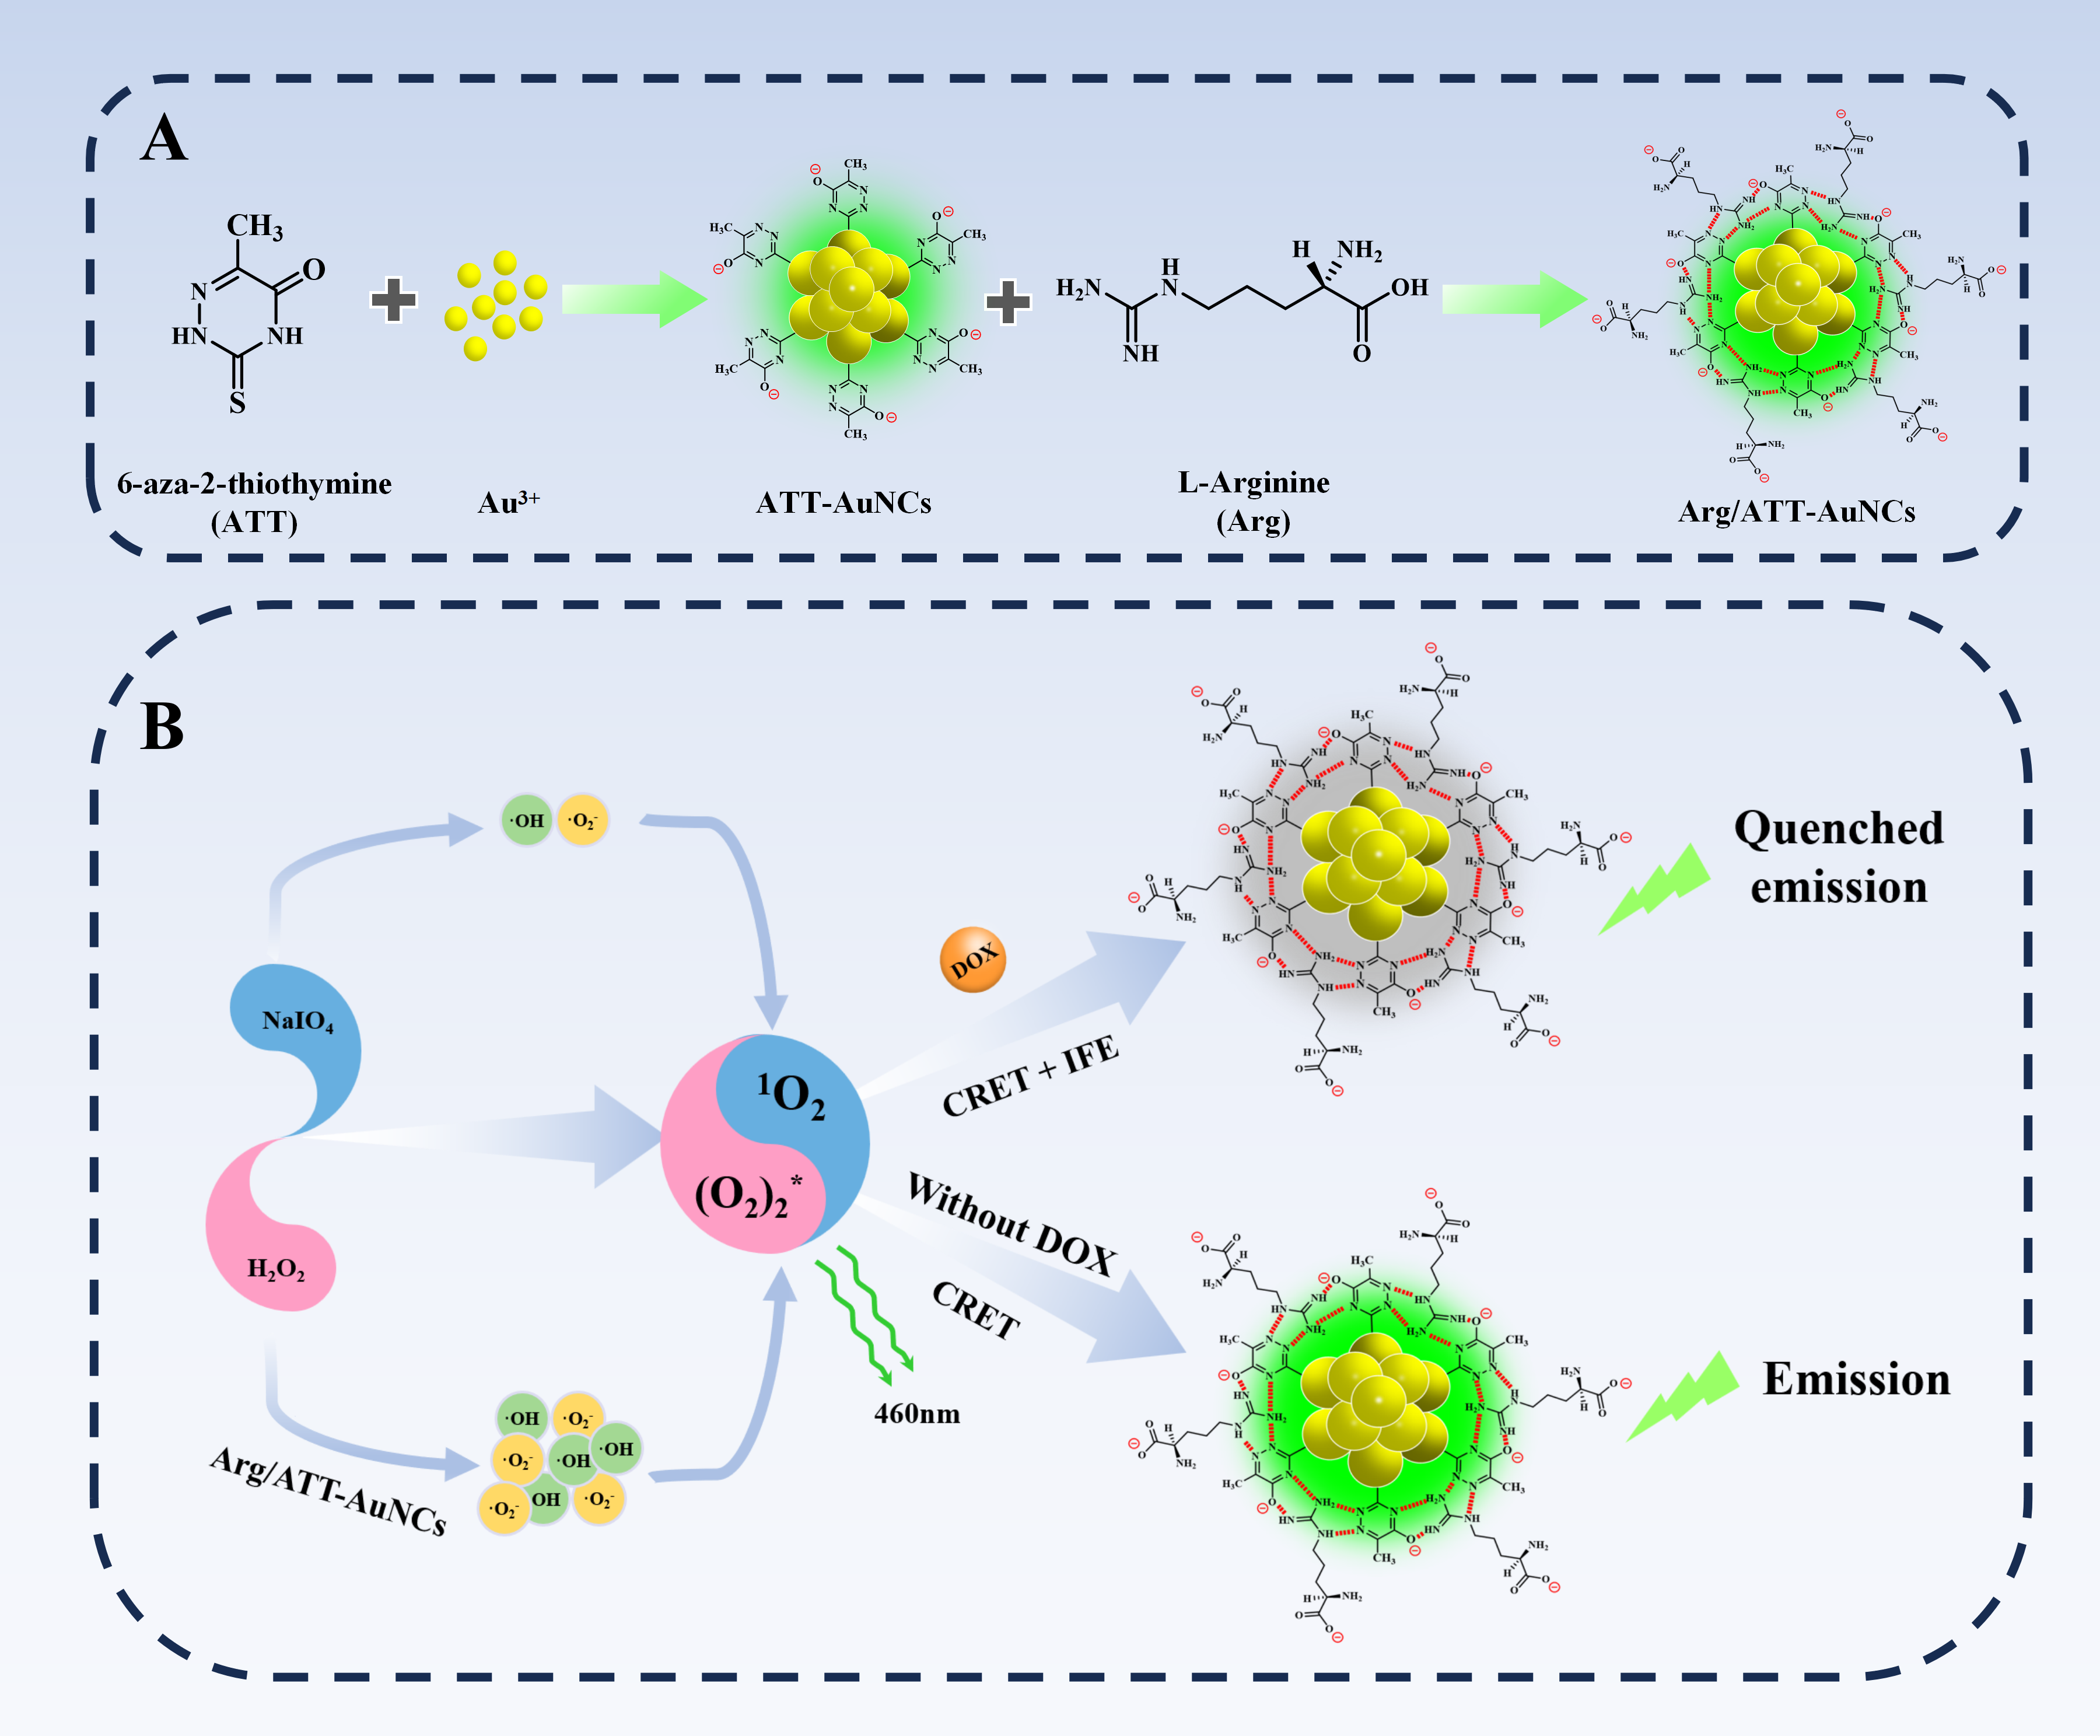


**Scheme 1**. Schematic illustration for (A) the synthesis of Arg/ATT-AuNCs via host-guest self-assembly, (B) CL emission of NaIO4-H2O2 induced by Arg/ATT-AuNCs and detection of DOX.
