# Supplementary material
Source: Research Square preprint supplement (doi:10.21203/rs.3.rs-9424134/v1)
Supplement: Supplementary file 3 [file 6d3bcacc9a7bd0555130729e.docx]

**Arginine-Engineered Gold Nanoclusters for Doxorubicin Chemiluminescence Sensing**

Chuangui Cai a, 1, Zhen Lin a, 1 *, Wensong Yao b*, Shan Lian a, Kaiyuan Huang a, Haohua Denga, XinhuaLin a, WeiChen a *

*a Department of Pharmaceutical Analysis, Faculty of Pharmacy, Fujian Medical University, Fuzhou 350122, China.*

*b College of Medical Sciences, Ningde Normal University, Ningde 352100, China.*

1 *These authors contributed equally to this work.*

* Corresponding author:

Tel./fax: +86 591 22862016.

E-mail address: [linwenjing002@163.com (Z](mailto:linwenjing002@163.com%20(Z). Lin), yiusunter@163.com (W. Yao), chenandhu@163.com (W. Chen)

1 These authors contributed equally to this work.

Table of contents

[Figure S1. Schematic diagram of a static CL setup. S3](#_Toc218440482)

[Figure S2. Schematic diagram for flow injection-CL system. S4](#_Toc218440483)

[Figure S3. Hydrodynamic diameter of Arg/ATT-AuNCs. S5](#_Toc218440484)

[Figure S4. Effect of radical scavengers on NaIO4-Arg/ATT-AuNCs-H2O2 system; Ascorbic acid; Thiourea; NBT; Histidine. S6](#_Toc218440485)

[Figure S5. UV-vis absorption spectrum and fluorescence spectrum of NaIO4-Arg/ATT-AuNCs-H2O2 system before and after CL reaction. S7](#_Toc218440486)

[Figure S6. CL Kinetic curve of NaIO4-Arg/ATT-AuNCs-H2O2 and NaIO4-Arg/ATT-AuNCs-H2O2 + 0.5 μM DOX. S8](#_Toc218440487)

[Figure S7. Condition optimization of NaIO4-Arg/ATT-AuNCs-H2O2 system. Concentration of H2O2, NaIO4, and Arg/ATT-AuNCs. pH of NaIO4. S9](#_Toc218440488)

[Table S1. Comparison of enhancement effect of different materials on NaIO4-H2O2 system. S10](#_Toc218440489)

[References: 11](#_Toc218440490)


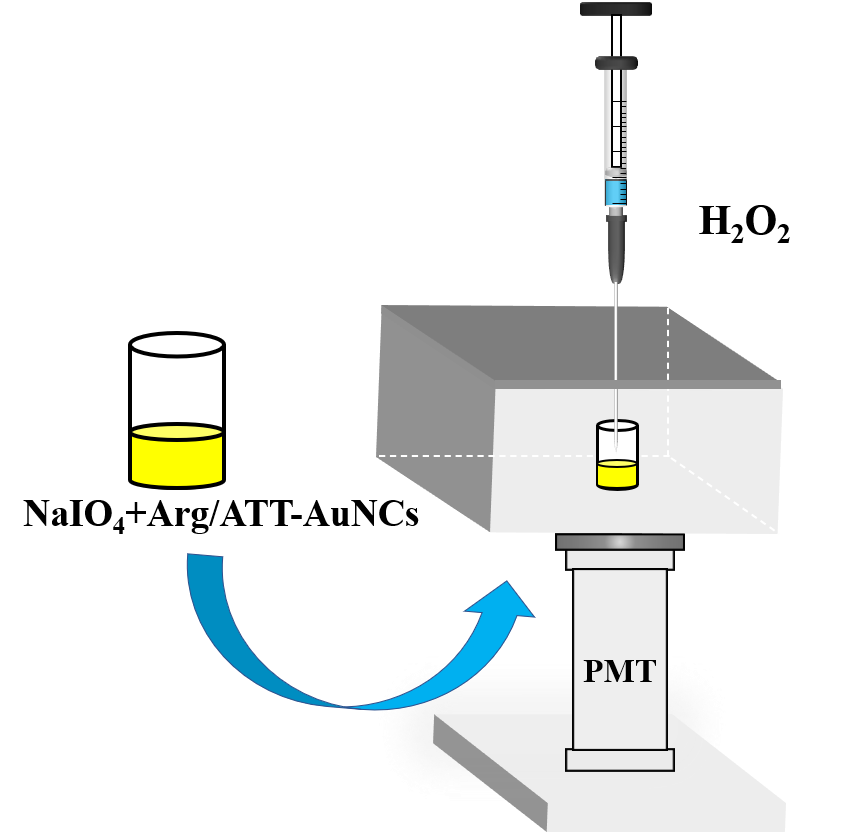


# **Figure S1.** Schematic diagram of a static CL setup.


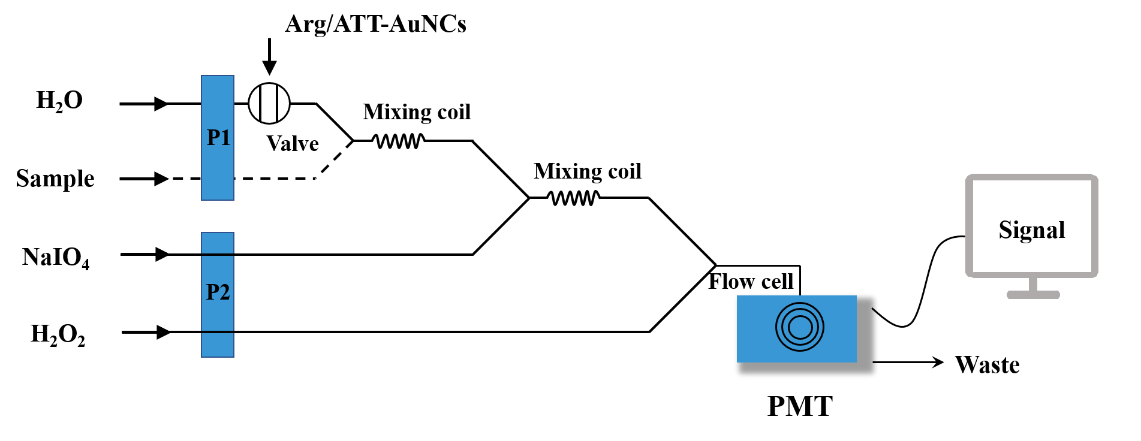


# **Figure S2.** Schematic diagram for flow injection-CL system.


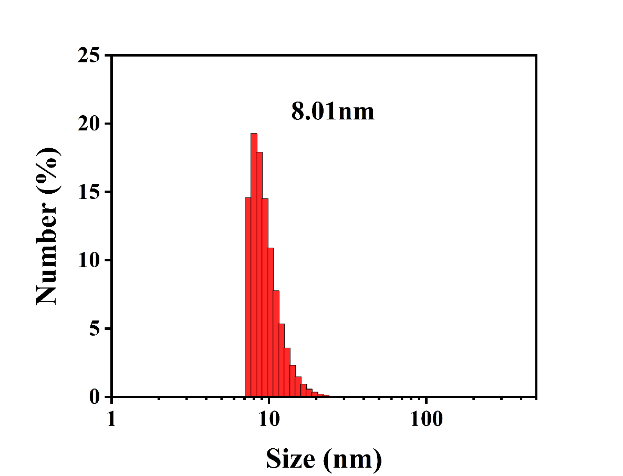


# **Figure S3.** Hydrodynamic diameter of Arg/ATT-AuNCs.


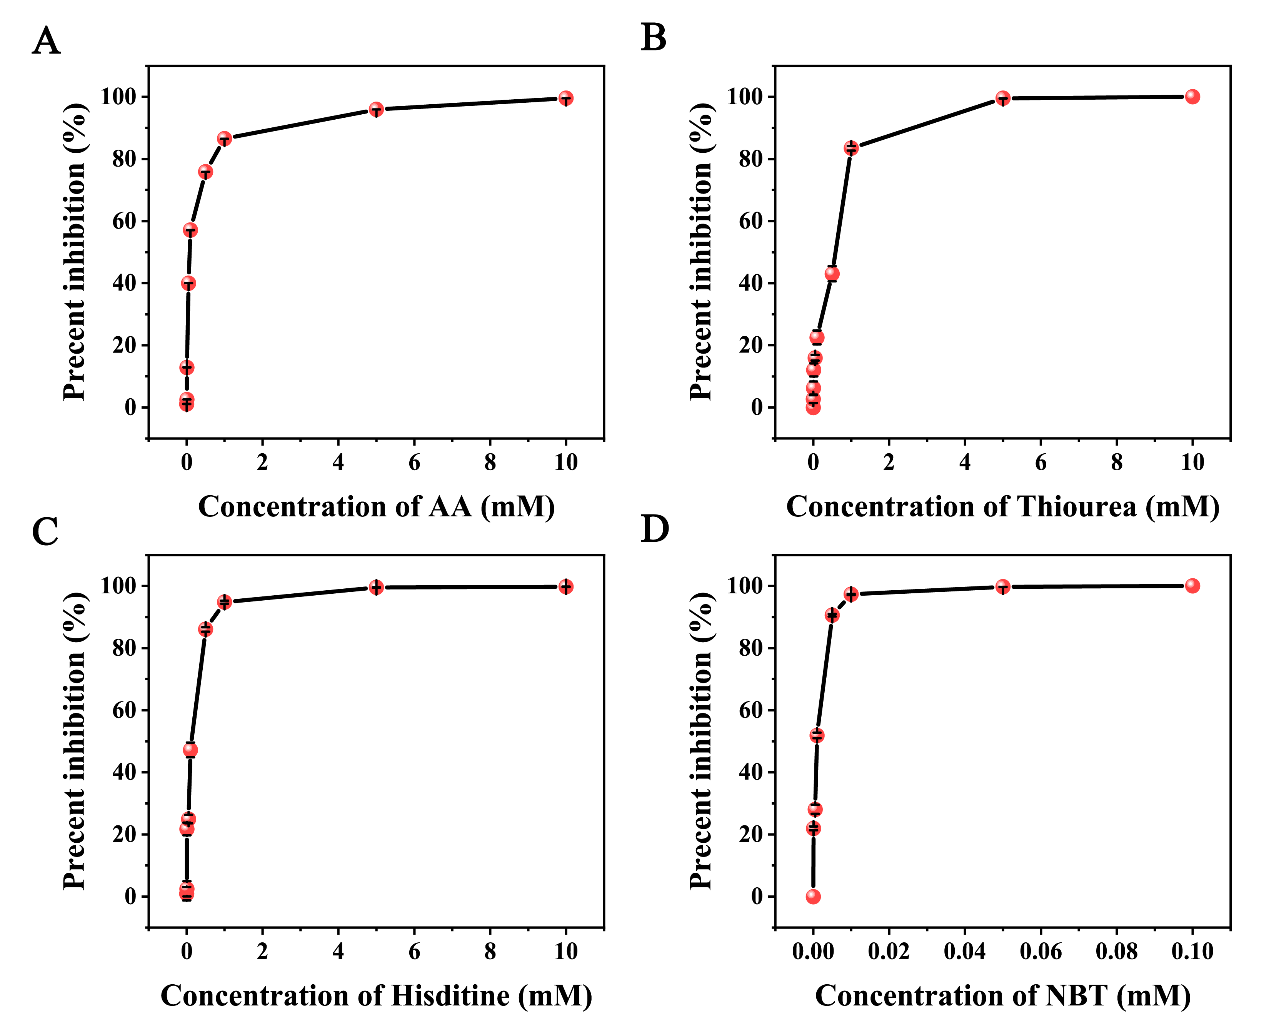


# **Figure S4.** Effect of radical scavengers on NaIO4-Arg/ATT-AuNCs-H2O2 system; (A) Ascorbic acid (AA); (B) Thiourea; (C) NBT; (D) Histidine.


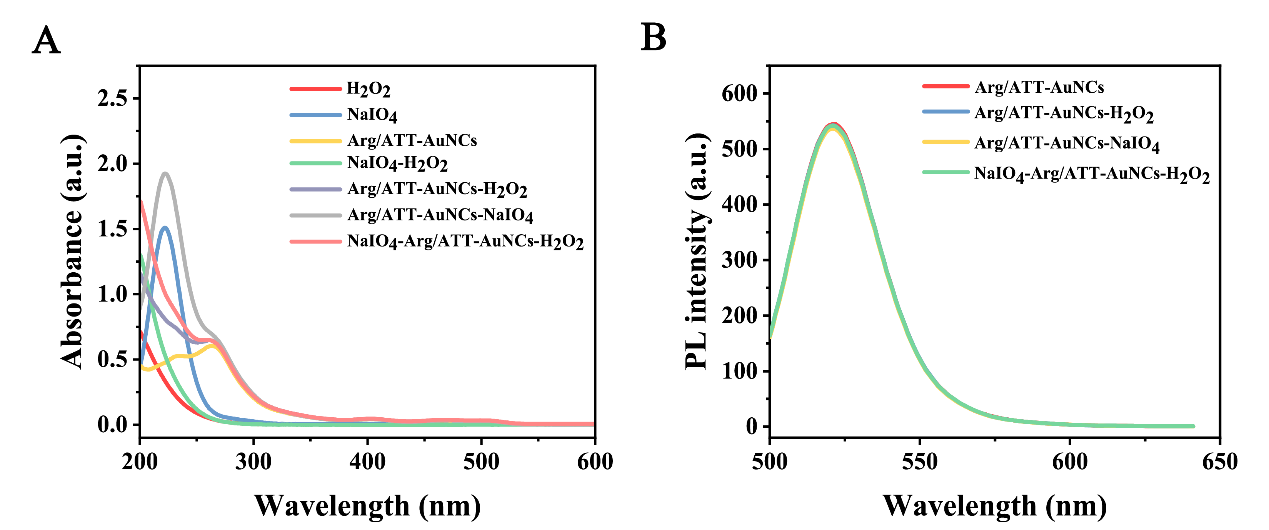


# **Figure S5.** UV-vis absorption spectrum (A) and fluorescence spectrum (B) of NaIO4-Arg/ATT-AuNCs-H2O2 system before and after CL reaction.


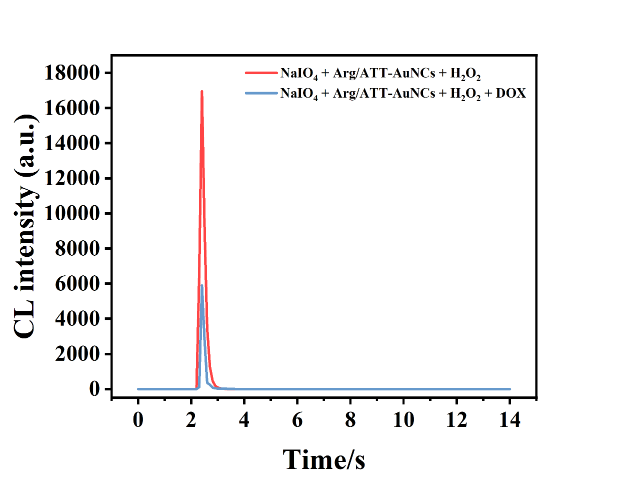


# **Figure S6.** CL Kinetic curve of NaIO4-Arg/ATT-AuNCs-H2O2 (red line) and NaIO4-Arg/ATT-AuNCs-H2O2 + 0.5 μM DOX (blue line).


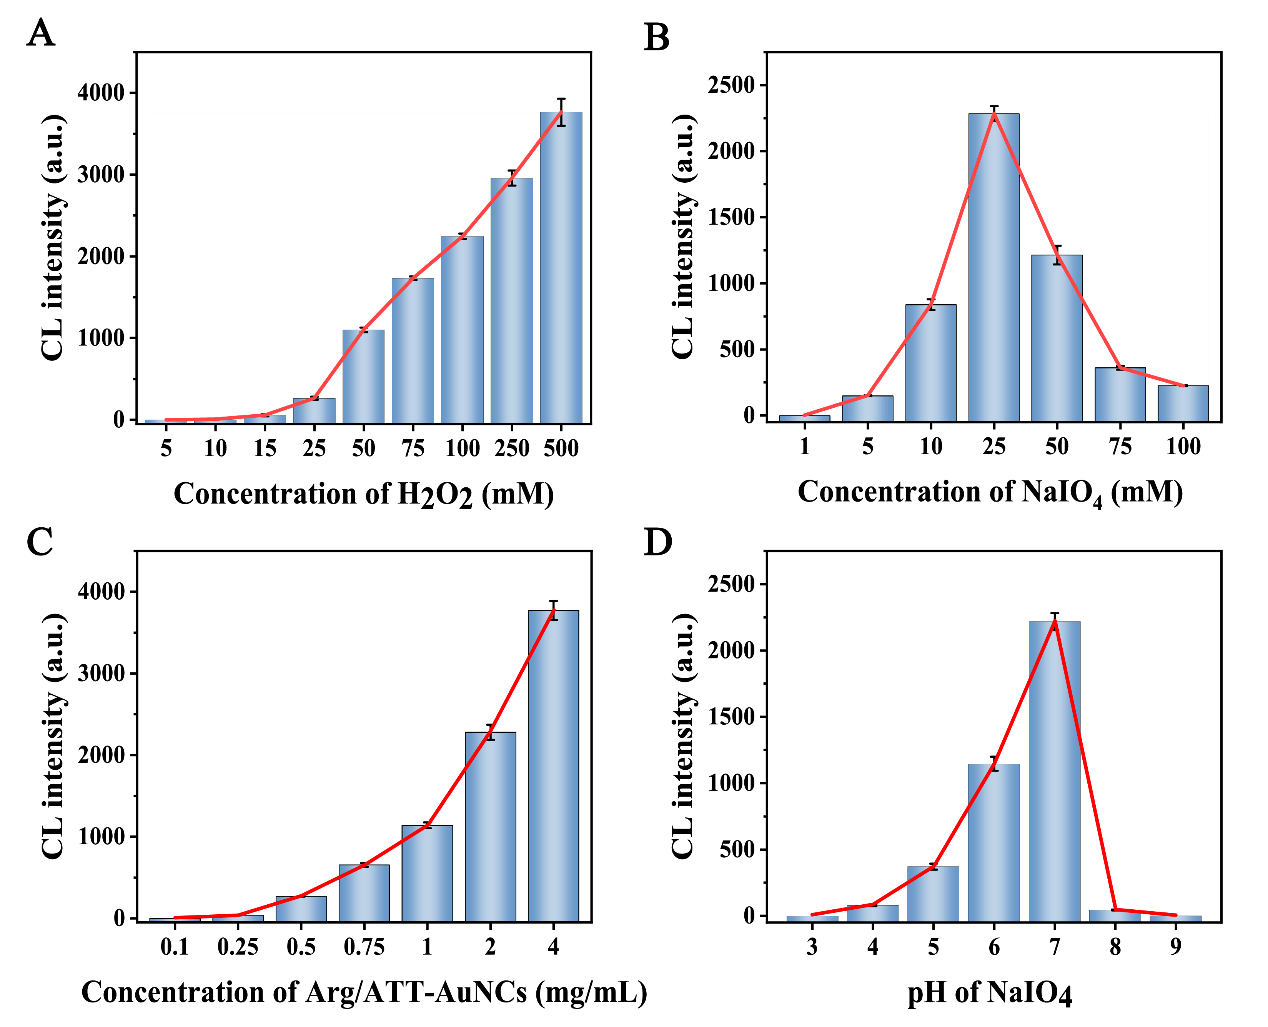


# **Figure S7.** Condition optimization of NaIO4-Arg/ATT-AuNCs-H2O2 system. Concentration of H2O2 (A), NaIO4 (B), and Arg/ATT-AuNCs. (D) pH of NaIO4.

# **Table S1**.

# Comparison of enhancement effect of different materials on NaIO4-H2O2 system.

| Numbers | Enhancer | CL System | Enhancer times | Ref. |
| --- | --- | --- | --- | --- |
| No.1 | N-CDs | KIO4-H2O2 | 38 | [1] |
| No.2 | SN-GQD | KIO4-H2O2 | 200 | [2] |
| No.3 | N-dots | NaIO4-H2O2 | 400 | [3] |
| No.4 | LaF3:Ce NPs | NaIO4-H2O2 | 80 | [4] |
| No.5 | AuNSs | NaIO4-H2O2 | 12 | [5] |
| No.6 | Co-MOF | NaIO4-H2O2 | 70 | [6] |
| No.7 | Mn-doped QDs | NaIO4-H2O2 | 135 | [7] |
| No.8 | Arg/ATT-AuNCs | NaIO4-H2O2 | 1223 | This work |

# **References:**

[1] Shah SNA, Li H, Lin J (2016) Enhancement of periodate-hydrogen peroxide chemiluminescence by nitrogen doped carbon dots and its application for the determination of pyrogallol and gallic acid. Talanta 153:23-30. [https://doi.org/10.1016/j.talanta.2016.02.056](https://doi.org/10.1016/j.talanta.2016.02.056" \o "Persistent link using digital object identifier" \t "_blank).

[2] Li Y, Wang J, Yang Y, Han S (2020) Sulfur and nitrogen co‐doped graphene quantum dot-assisted chemiluminescence for sensitive detection of tryptophan and mercury (II). Luminescence 35:773-80. https://doi.org/10.1002/bio.3783.

[3] Zheng Y, Zhang D, Shah SNA, Li H, Lin J (2017) Ultra-weak chemiluminescence enhanced by facilely synthesized nitrogen-rich quantum dots through chemiluminescence resonance energy transfer and electron hole injection. Chem Commun 53:5657-60. <https://doi.org/10.1039/C7CC02041D>.

[4] Wang Y, Huang C, Wang Y, Chen T, Wu J (2021) Chemiluminescence enhanced by cerium-doped LaF3 nanoparticles through electron-hole annihilation. J Lumines 239:118407. <https://doi.org/10.1016/j.jlumin.2021.118407>.

[5] Amjadi M, Abolghasemi-Fakhri Z (2018) Gold nanostar-enhanced chemiluminescence probe for highly sensitive detection of Cu (II) ions. Sens Actuator B Chem 257:629-34. <https://doi.org/10.1016/j.snb.2017.11.013>.

[6] Wang Y, Wang Z, Liu Y, Liu Z, Gao Z, Li K, Zhao D, Wu J, Liu X (2023) Pyrogallol detection based on the cobalt metal-organic framework of nanomaterial-enhanced chemiluminescence. Chemosensors 11:395. https://doi.org/10.3390/chemosensors11070395.

[7] Liu J, Chen H, Lin L, Lu C, Lin J (2010) Sensitized chemiluminescence reaction between hydrogen peroxide and periodate of different types of Mn-doped ZnS quantum dots. Chin Sci Bull 55:3479-84. https://doi.org/10.1007/s11434-010-4059-6.
