# Supplementary material
Source: Research Square preprint supplement (doi:10.21203/rs.3.rs-9424134/v1)

**Graphical Abstract:**

**
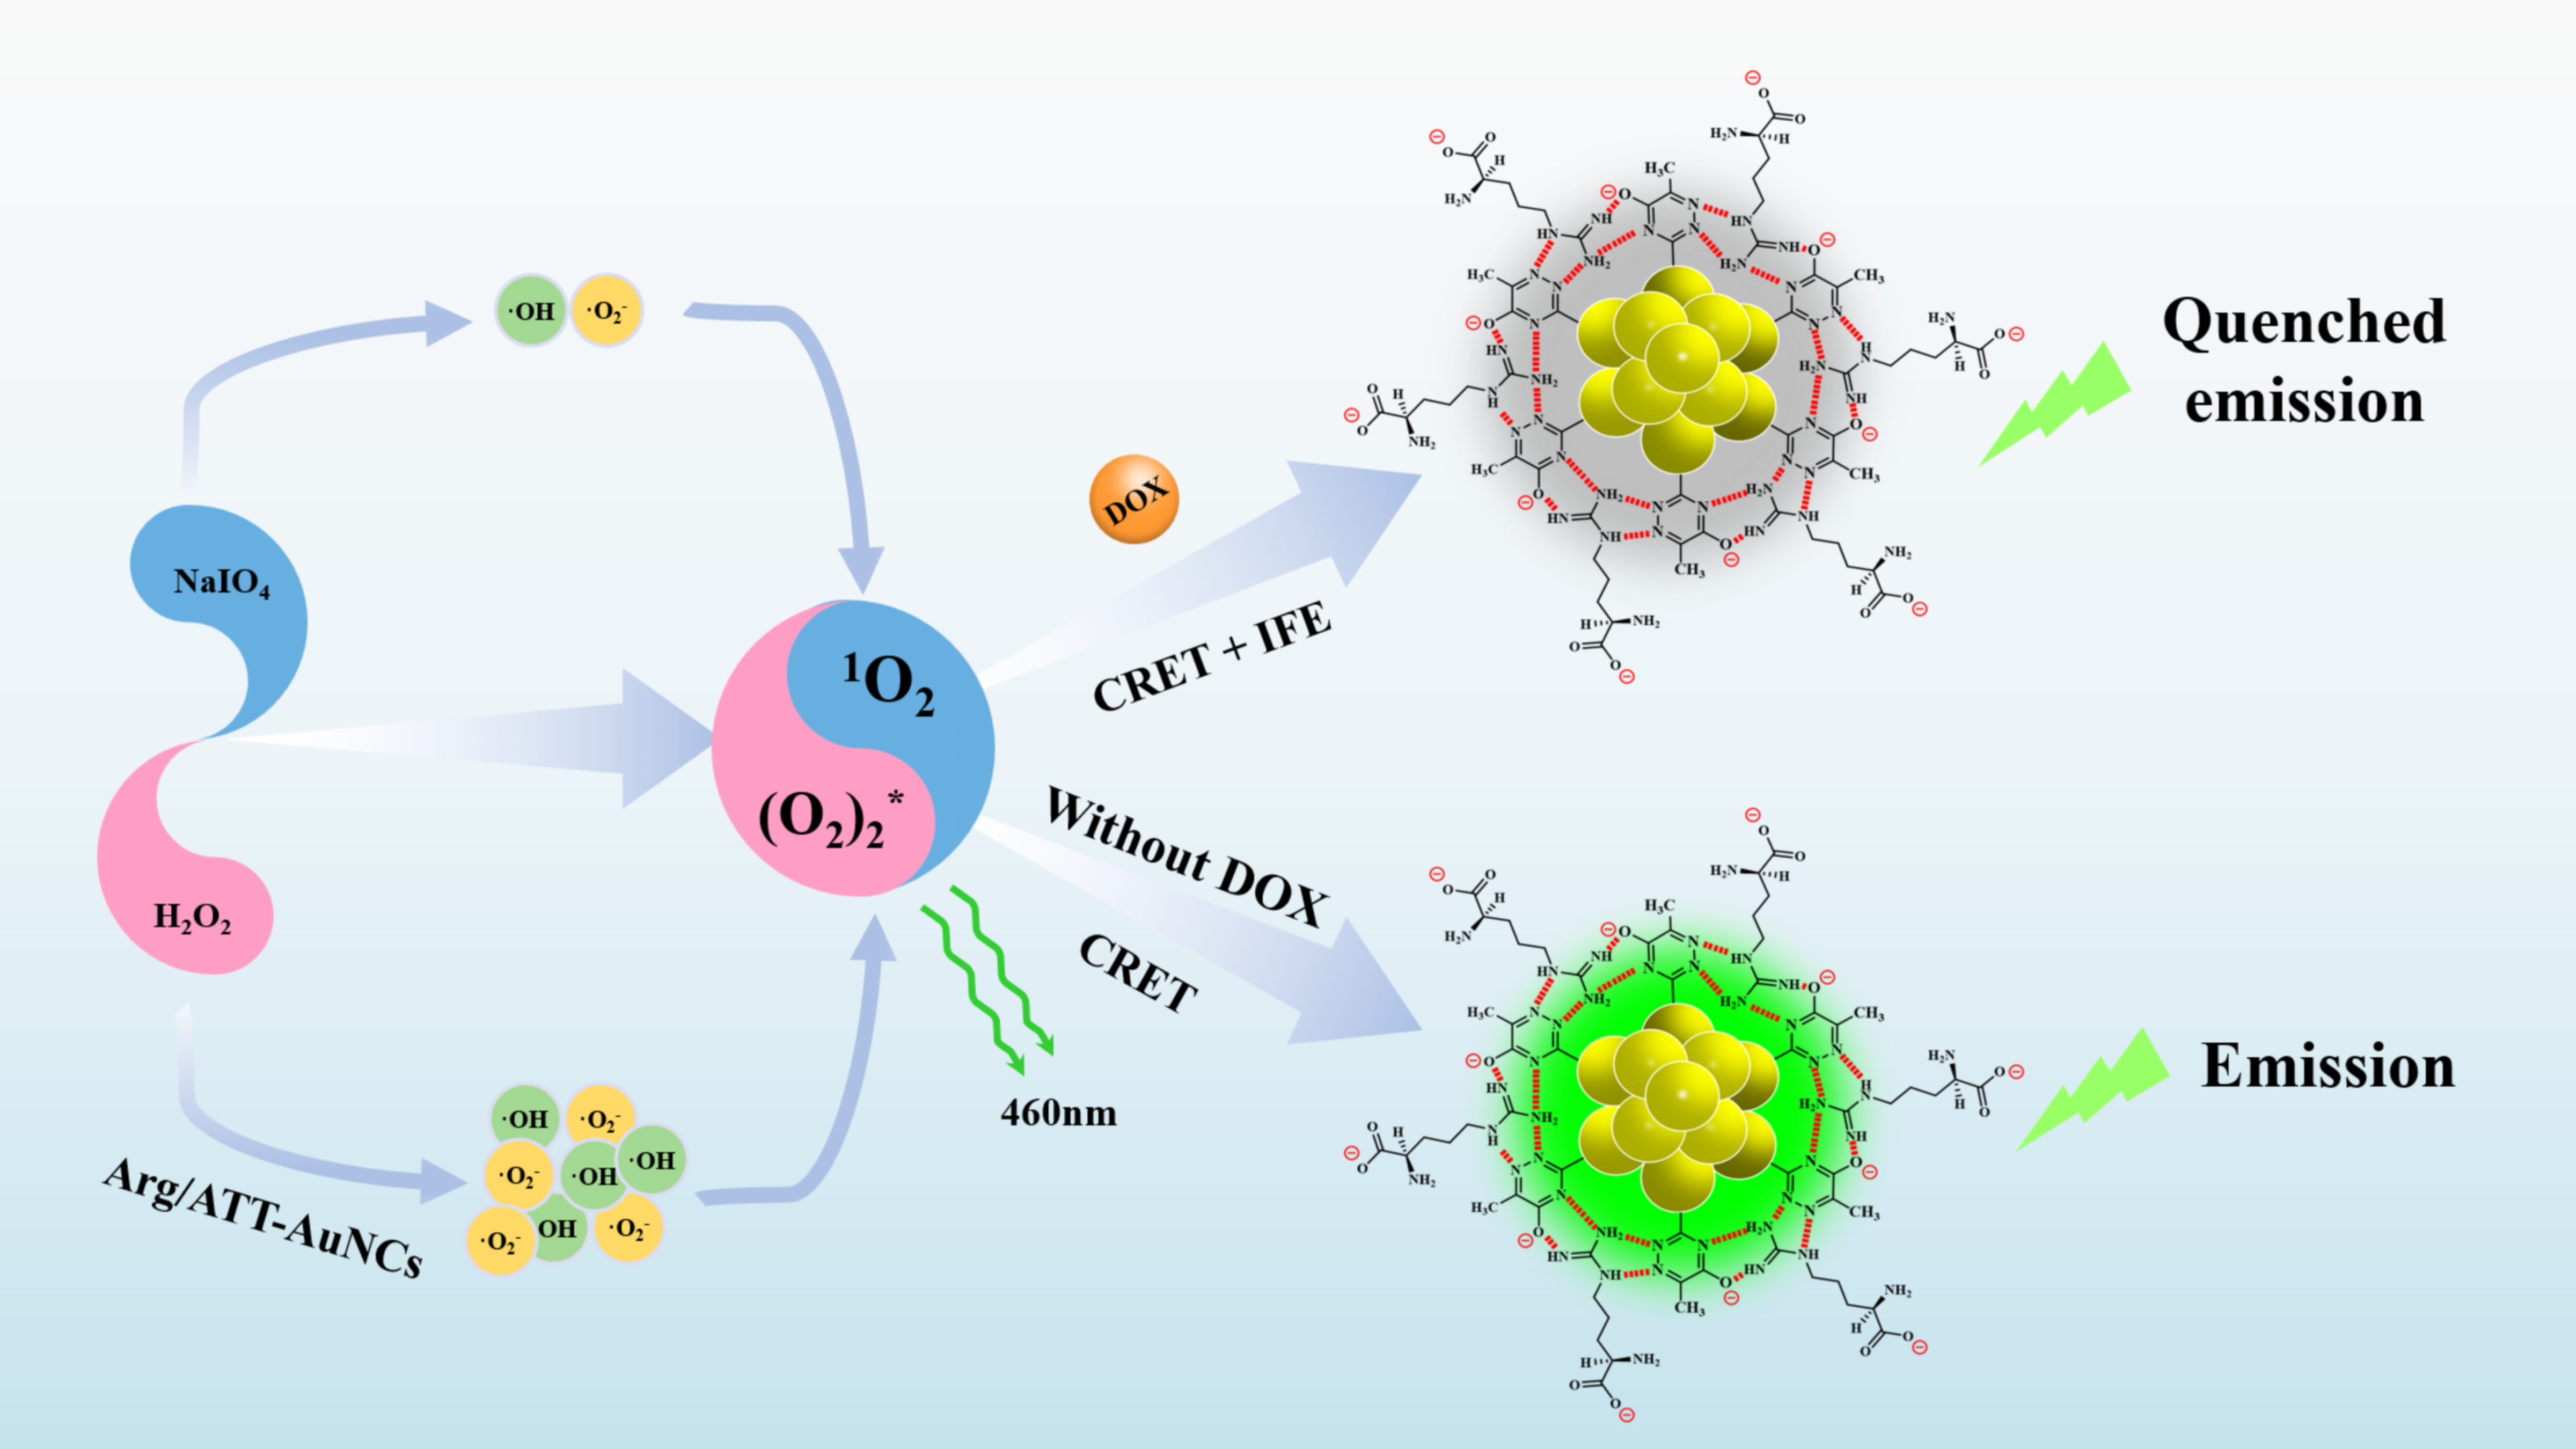
**

Supplement: Supplementary file 2 [file 6511e5083c978d0cdad6f628.docx]
